# Supplementary material for: Role of the keratin 1 and keratin 10 tails in the pathogenesis of ichthyosis hystrix of Curth Macklin
Source: PLOS journal article supplement (doi:10.1371/journal.pone.0195792), 2018-04-24

Figure Supplementary 1

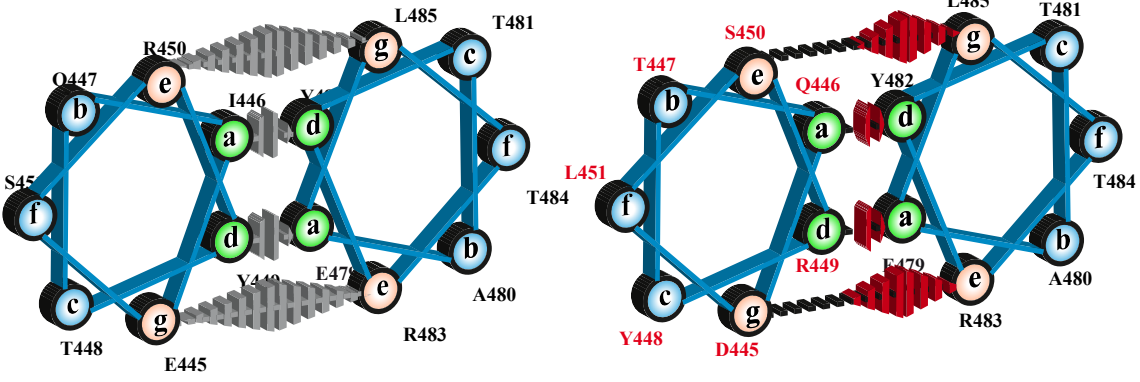

Supplement: S1 (10.1371/journal.pone.0195792.s001) [file journal.pone.0195792.s001]
